# Supplementary material for: Connecting microfluidic chips using a chemically inert, reversible, multichannel chip-to-world-interface
Source: Royal Society of Chemistry journal article supplement (doi:10.1039/c3lc50861g), 2013-01-01
Supplement: c3lc50861g_2.pdf [file c3lc50861g_2.pdf]

| REVISION HISTORY |             |      |          |
|------------------|-------------|------|----------|
| REV              | DESCRIPTION | DATE | APPROVED |
|                  |             |      |          |

material: aluminum

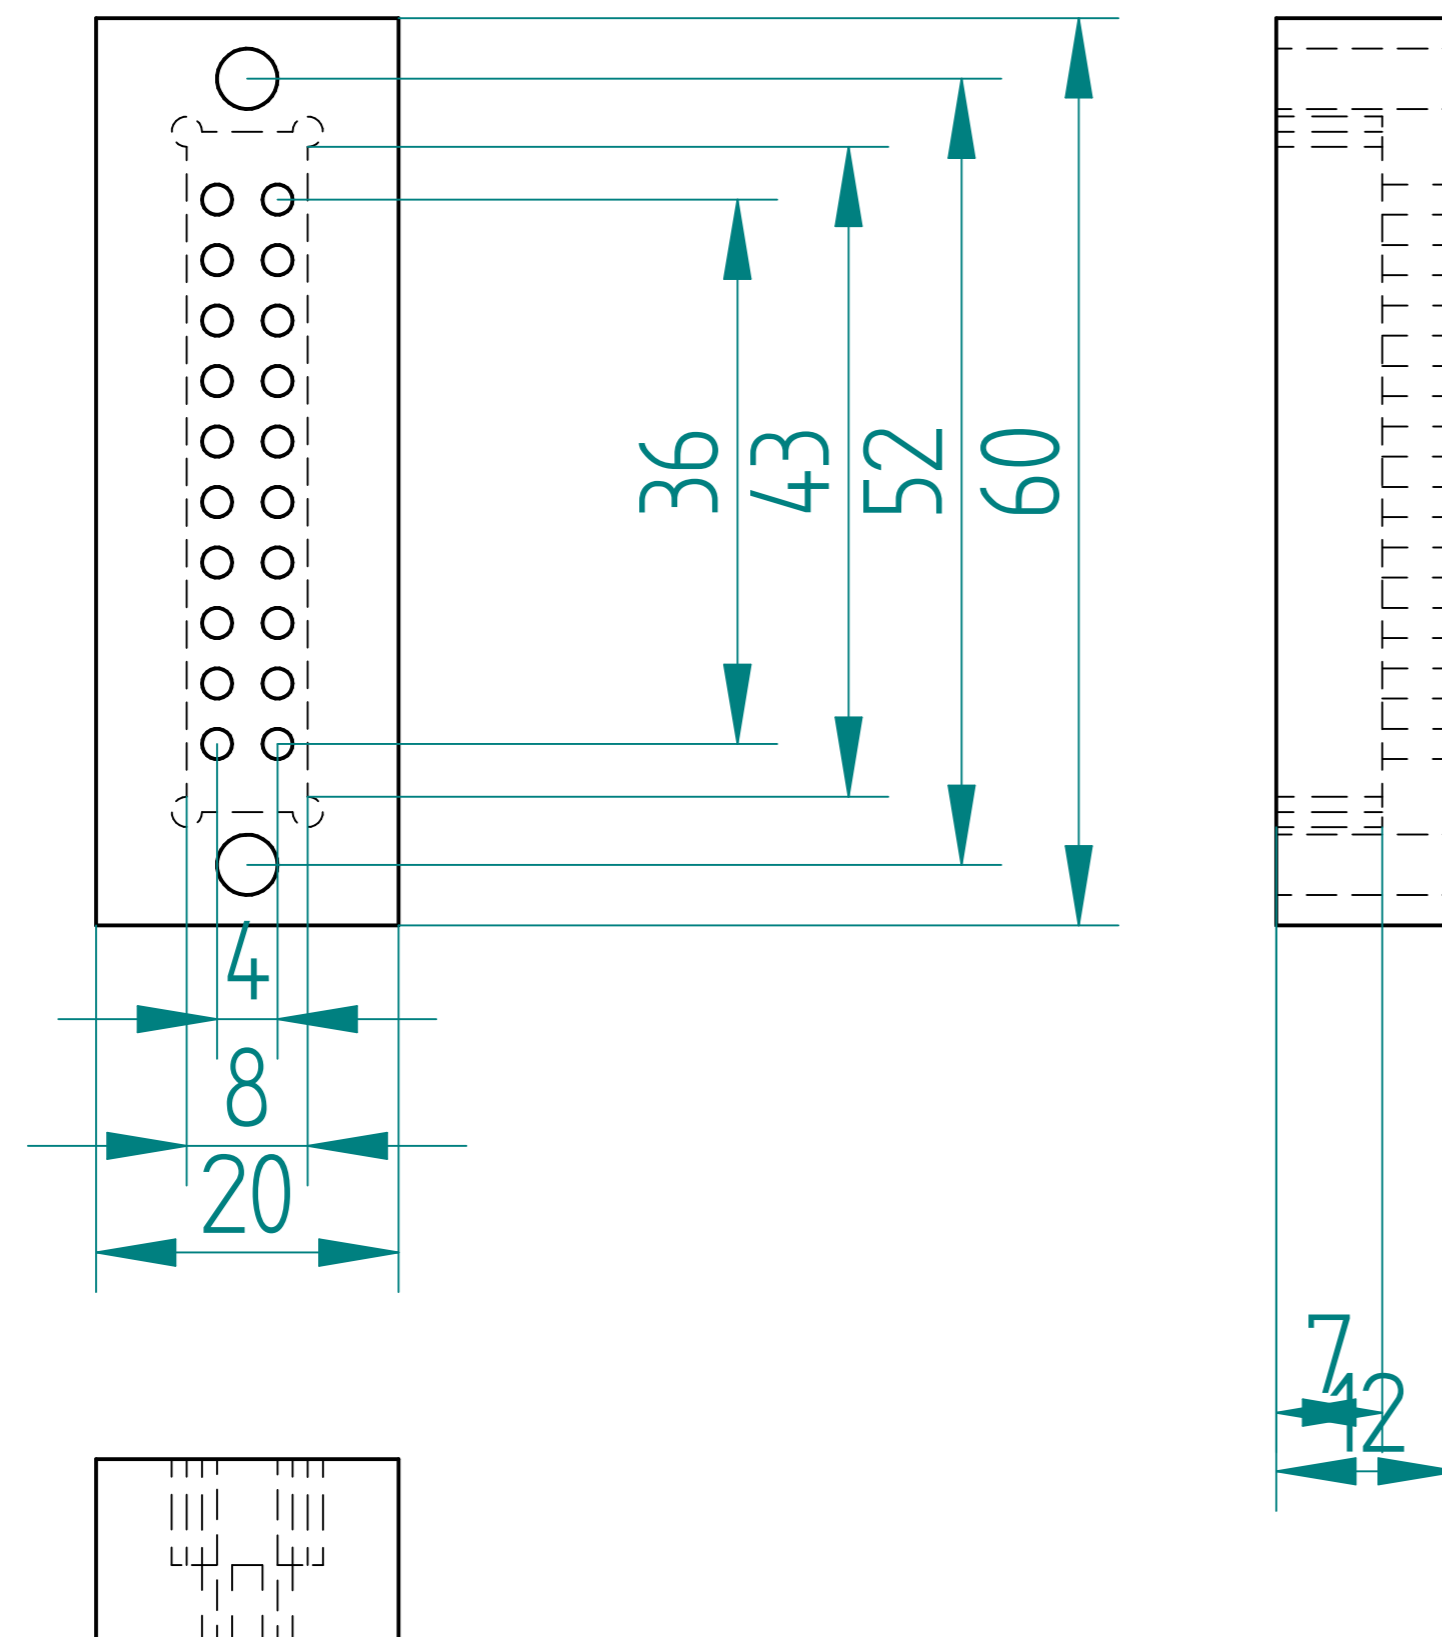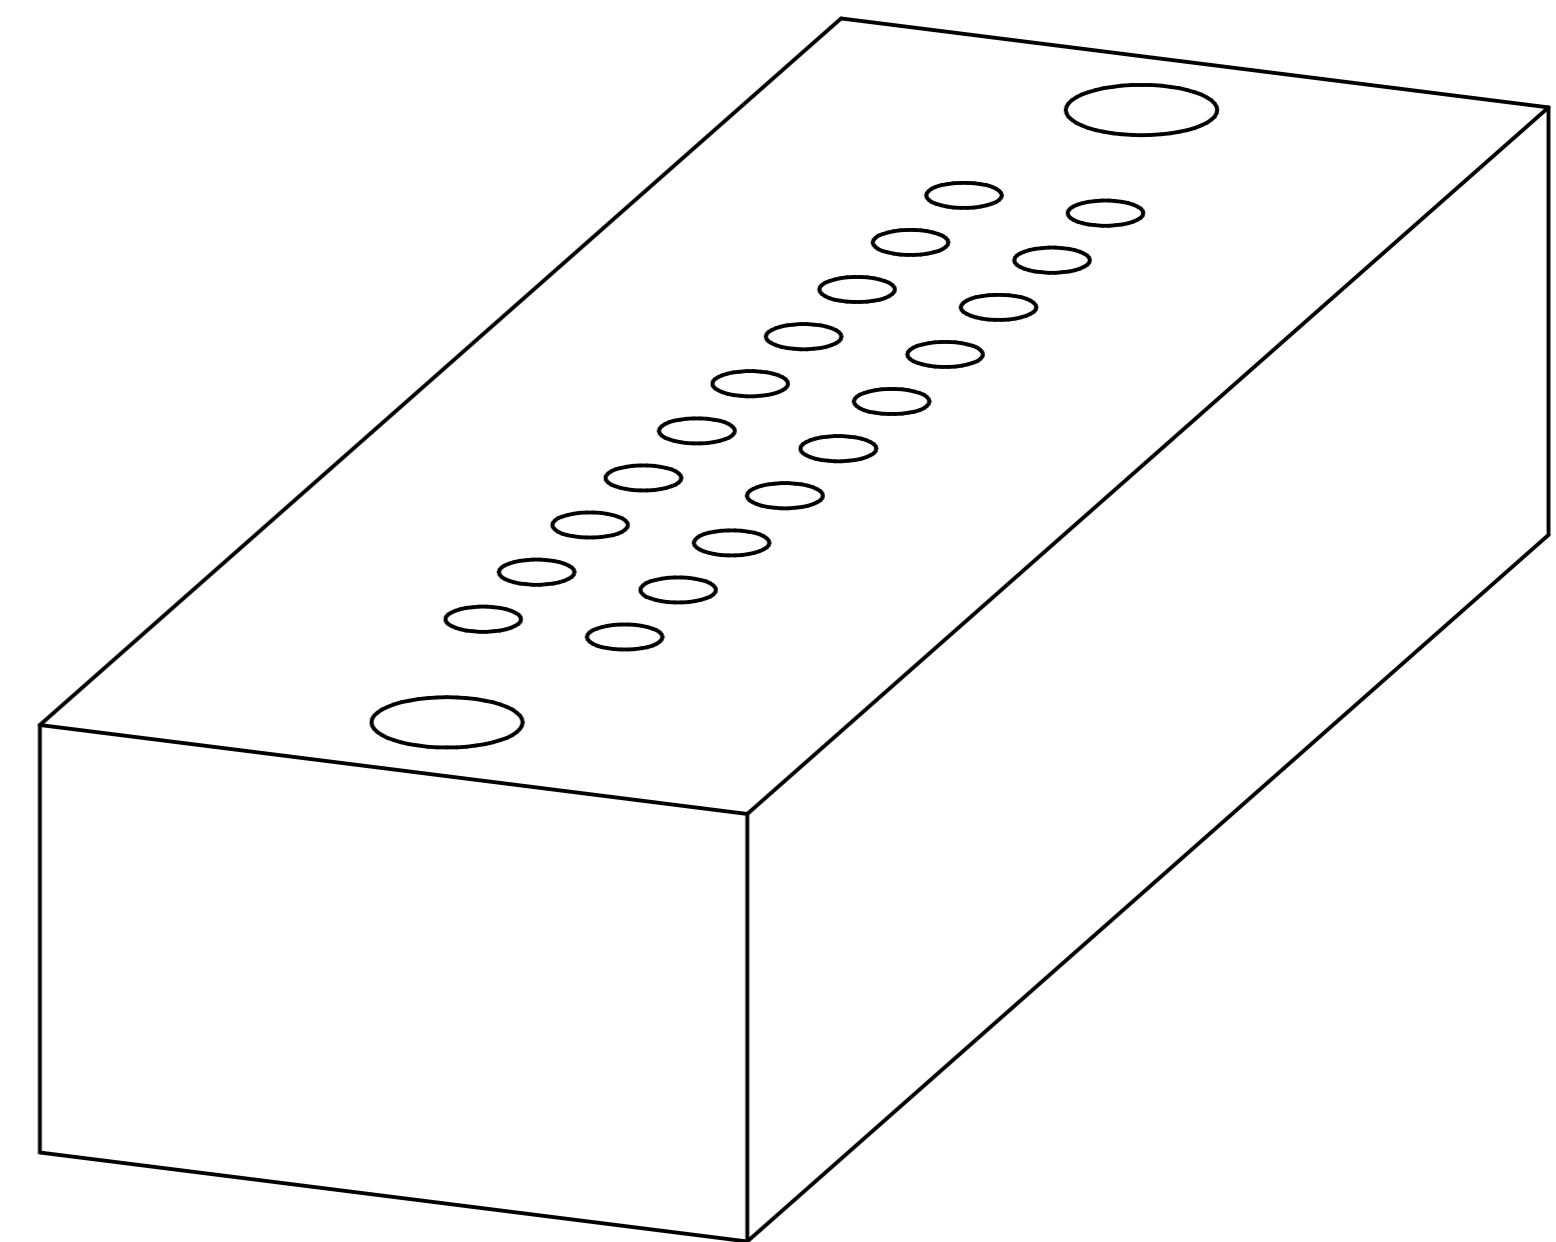

SOLID EDGE ACADEMIC COPY

|                                                                                                     |           |          |                          |              |
|-----------------------------------------------------------------------------------------------------|-----------|----------|--------------------------|--------------|
|                                                                                                     | NAME      | DATE     | Solid Edge               |              |
| DRAWN                                                                                               | wilhelm-e | 07/12/13 | TITLE                    |              |
| CHECKED                                                                                             |           |          | metal frame CW120        |              |
| ENG APPR                                                                                            |           |          | SIZE                     | DWG NO       |
| MGR APPR                                                                                            |           |          | A2                       |              |
| UNLESS OTHERWISE SPECIFIED<br>DIMENSIONS ARE IN MILLIMETERS<br>ANGLES ±X.X°<br>2 PL ±XXX 3 PL ±XXXX |           |          | FILE NAME:               | REV          |
|                                                                                                     |           |          | aluminum_frame_CW120.dft |              |
|                                                                                                     |           |          | SCALE:                   | WEIGHT:      |
|                                                                                                     |           |          |                          | SHEET 1 OF 1 |
