# Supplementary material for: Connecting microfluidic chips using a chemically inert, reversible, multichannel chip-to-world-interface
Source: Royal Society of Chemistry journal article supplement (doi:10.1039/c3lc50861g), 2013-01-01
Supplement: c3lc50861g_4.pdf [file c3lc50861g_4.pdf]

| REVISION HISTORY |             |      |          |
|------------------|-------------|------|----------|
| REV              | DESCRIPTION | DATE | APPROVED |
|                  |             |      |          |

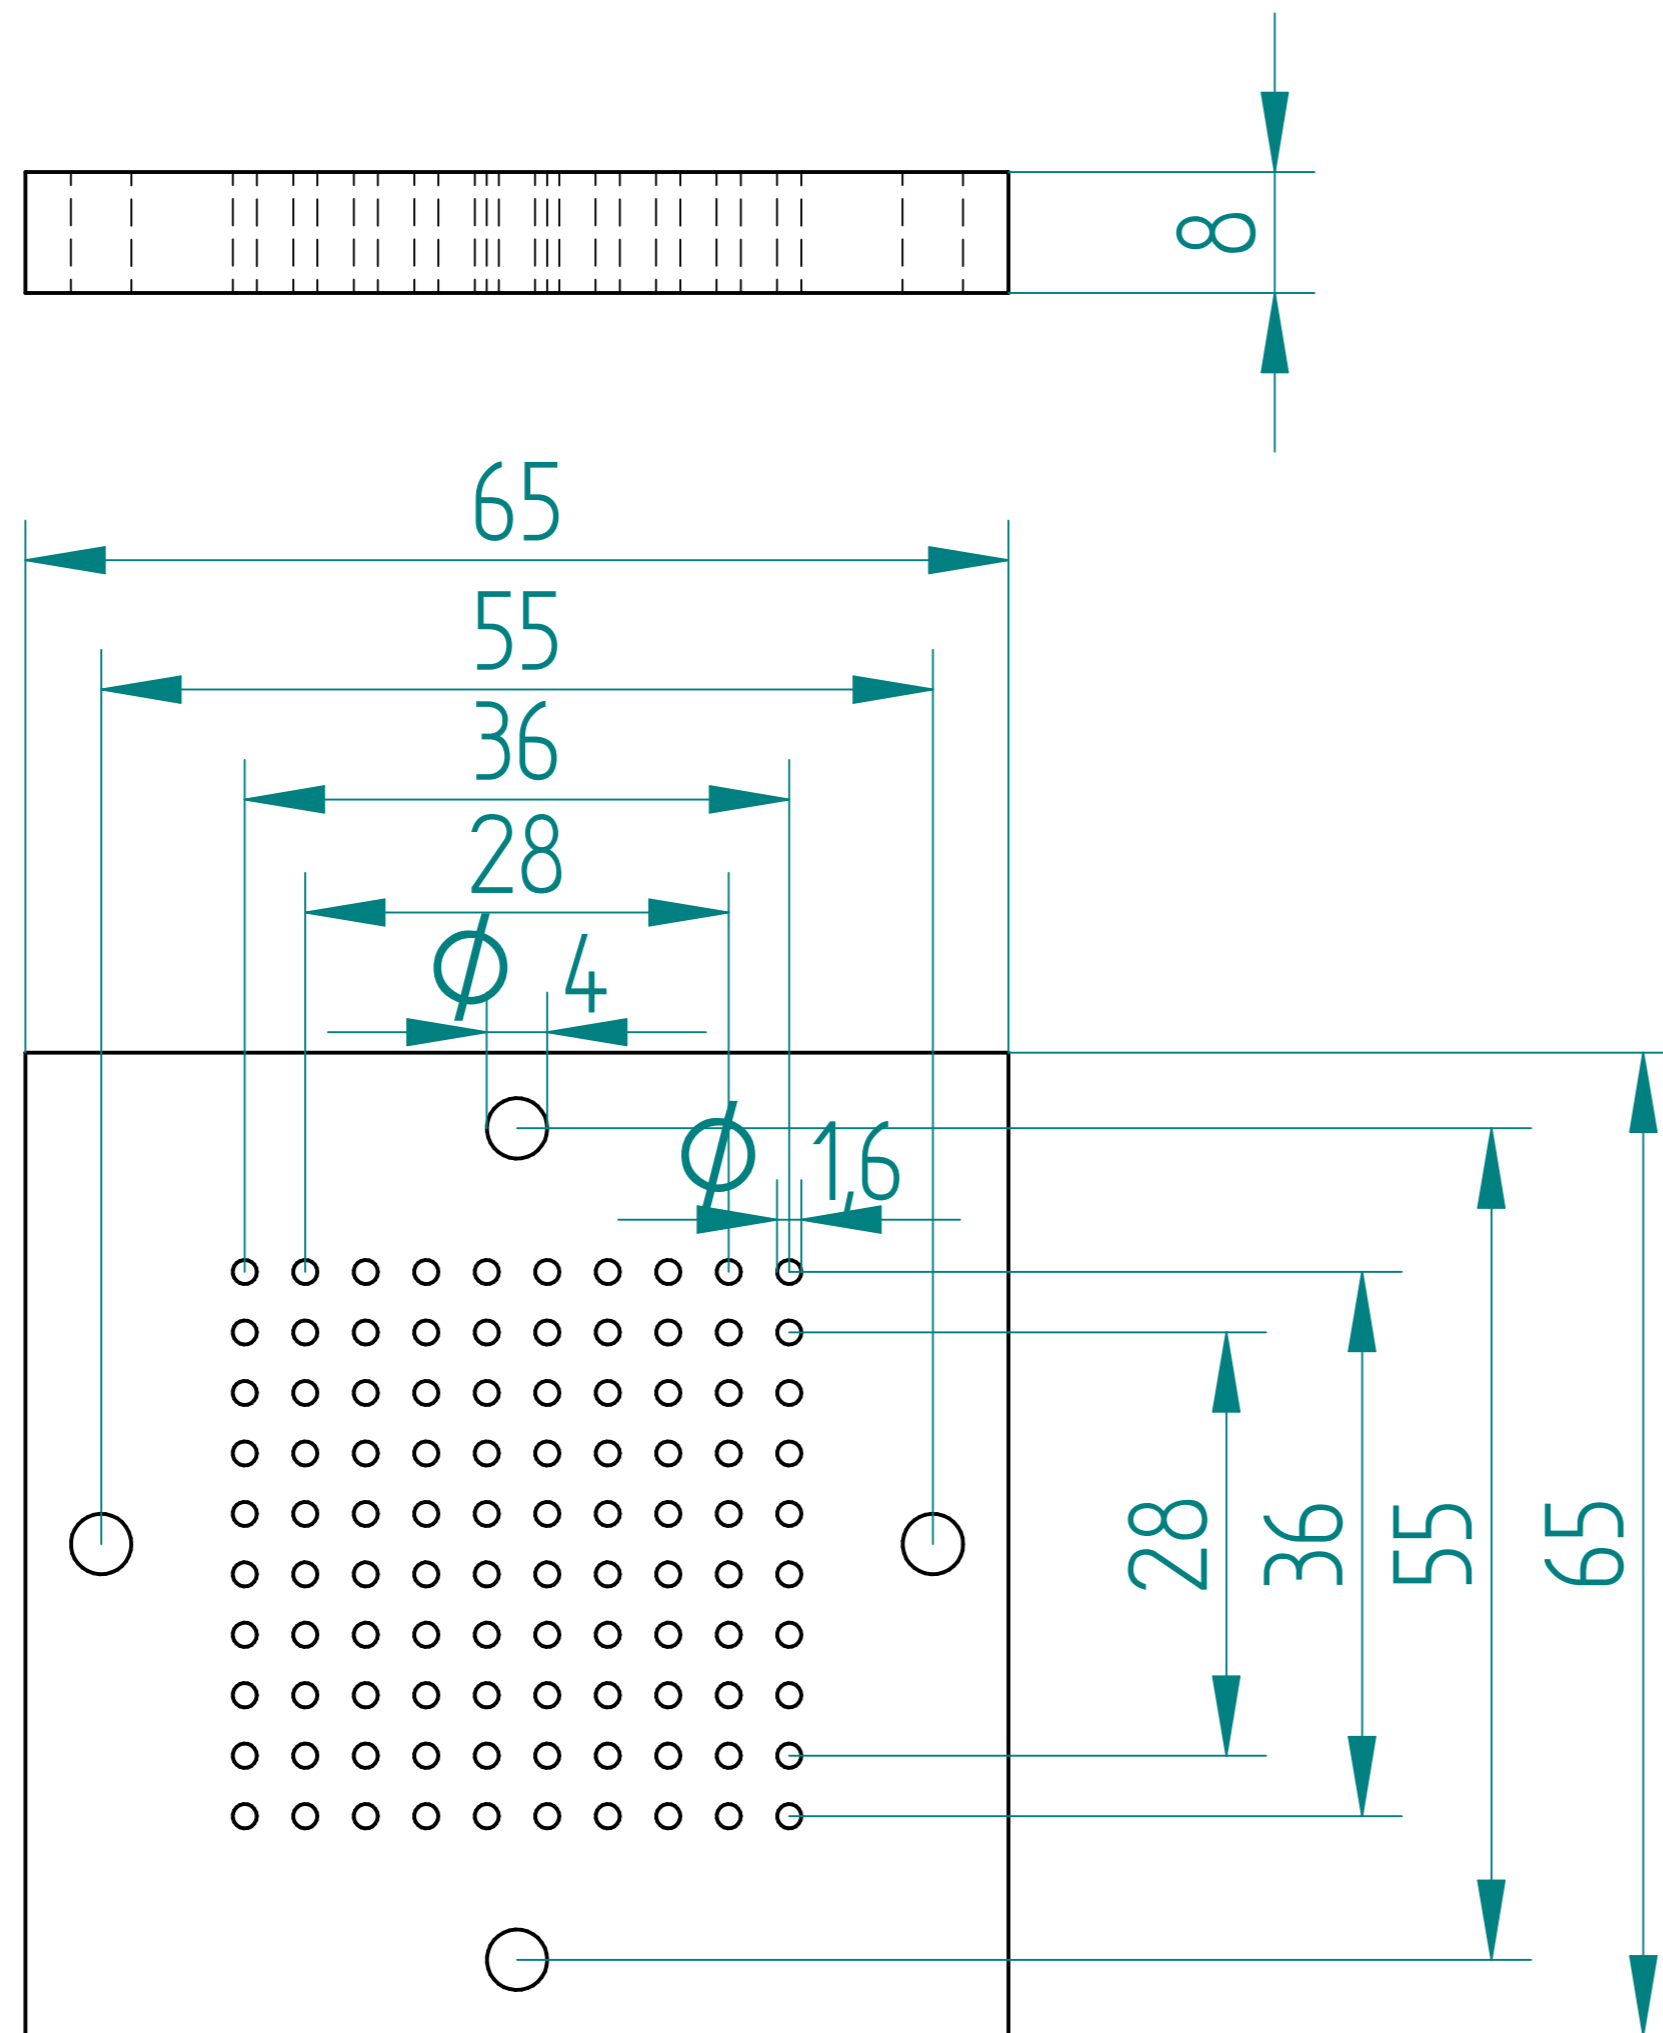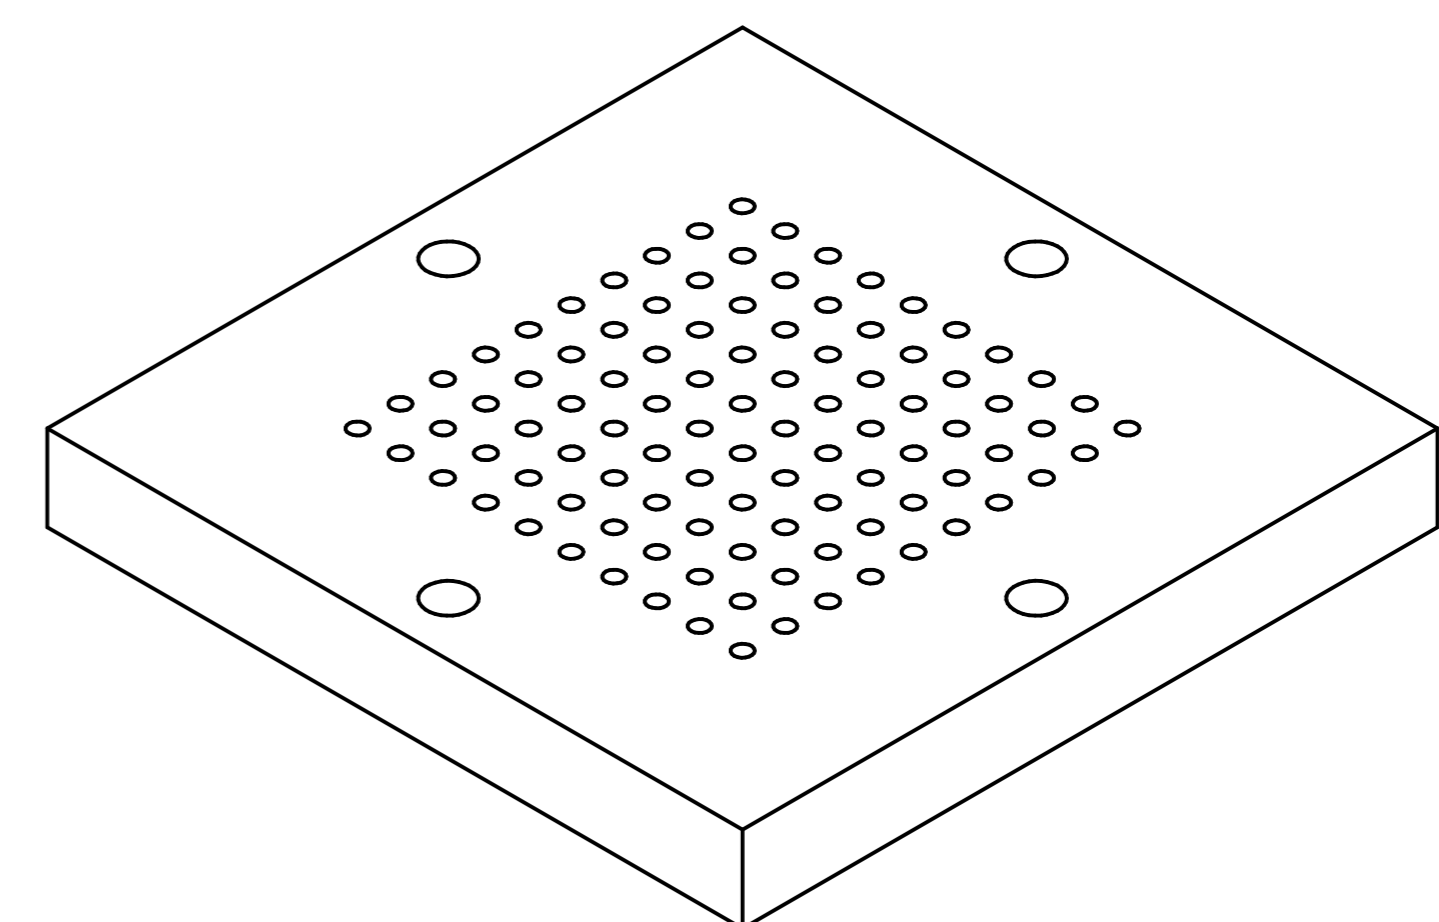

SOLID EDGE ACADEMIC COPY

|                                                                           |           |              |                       |        |
|---------------------------------------------------------------------------|-----------|--------------|-----------------------|--------|
|                                                                           | NAME      | DATE         | Solid Edge            |        |
| DRAWN                                                                     | wilhelm-e | 07/12/13     | TITLE                 |        |
| CHECKED                                                                   |           |              | bottom plate mold     |        |
| ENG APPR                                                                  |           |              | SIZE                  | DWG NO |
| MGR APPR                                                                  |           |              | A2                    |        |
| UNLESS OTHERWISE SPECIFIED<br>DIMENSIONS ARE IN MILLIMETERS<br>ANGLES ±X° |           |              | FILE NAME:            | REV    |
| 2 PL ±XXX 3 PL ±XXXX                                                      |           |              | bottom_plate_mold.dft |        |
| SCALE:                                                                    | WEIGHT:   | SHEET 1 OF 1 |                       |        |
