# Supplementary material for: Connecting microfluidic chips using a chemically inert, reversible, multichannel chip-to-world-interface
Source: Royal Society of Chemistry journal article supplement (doi:10.1039/c3lc50861g), 2013-01-01
Supplement: c3lc50861g_8.pdf [file c3lc50861g_8.pdf]

| REVISION HISTORY |             |      |          |
|------------------|-------------|------|----------|
| REV              | DESCRIPTION | DATE | APPROVED |
|                  |             |      |          |

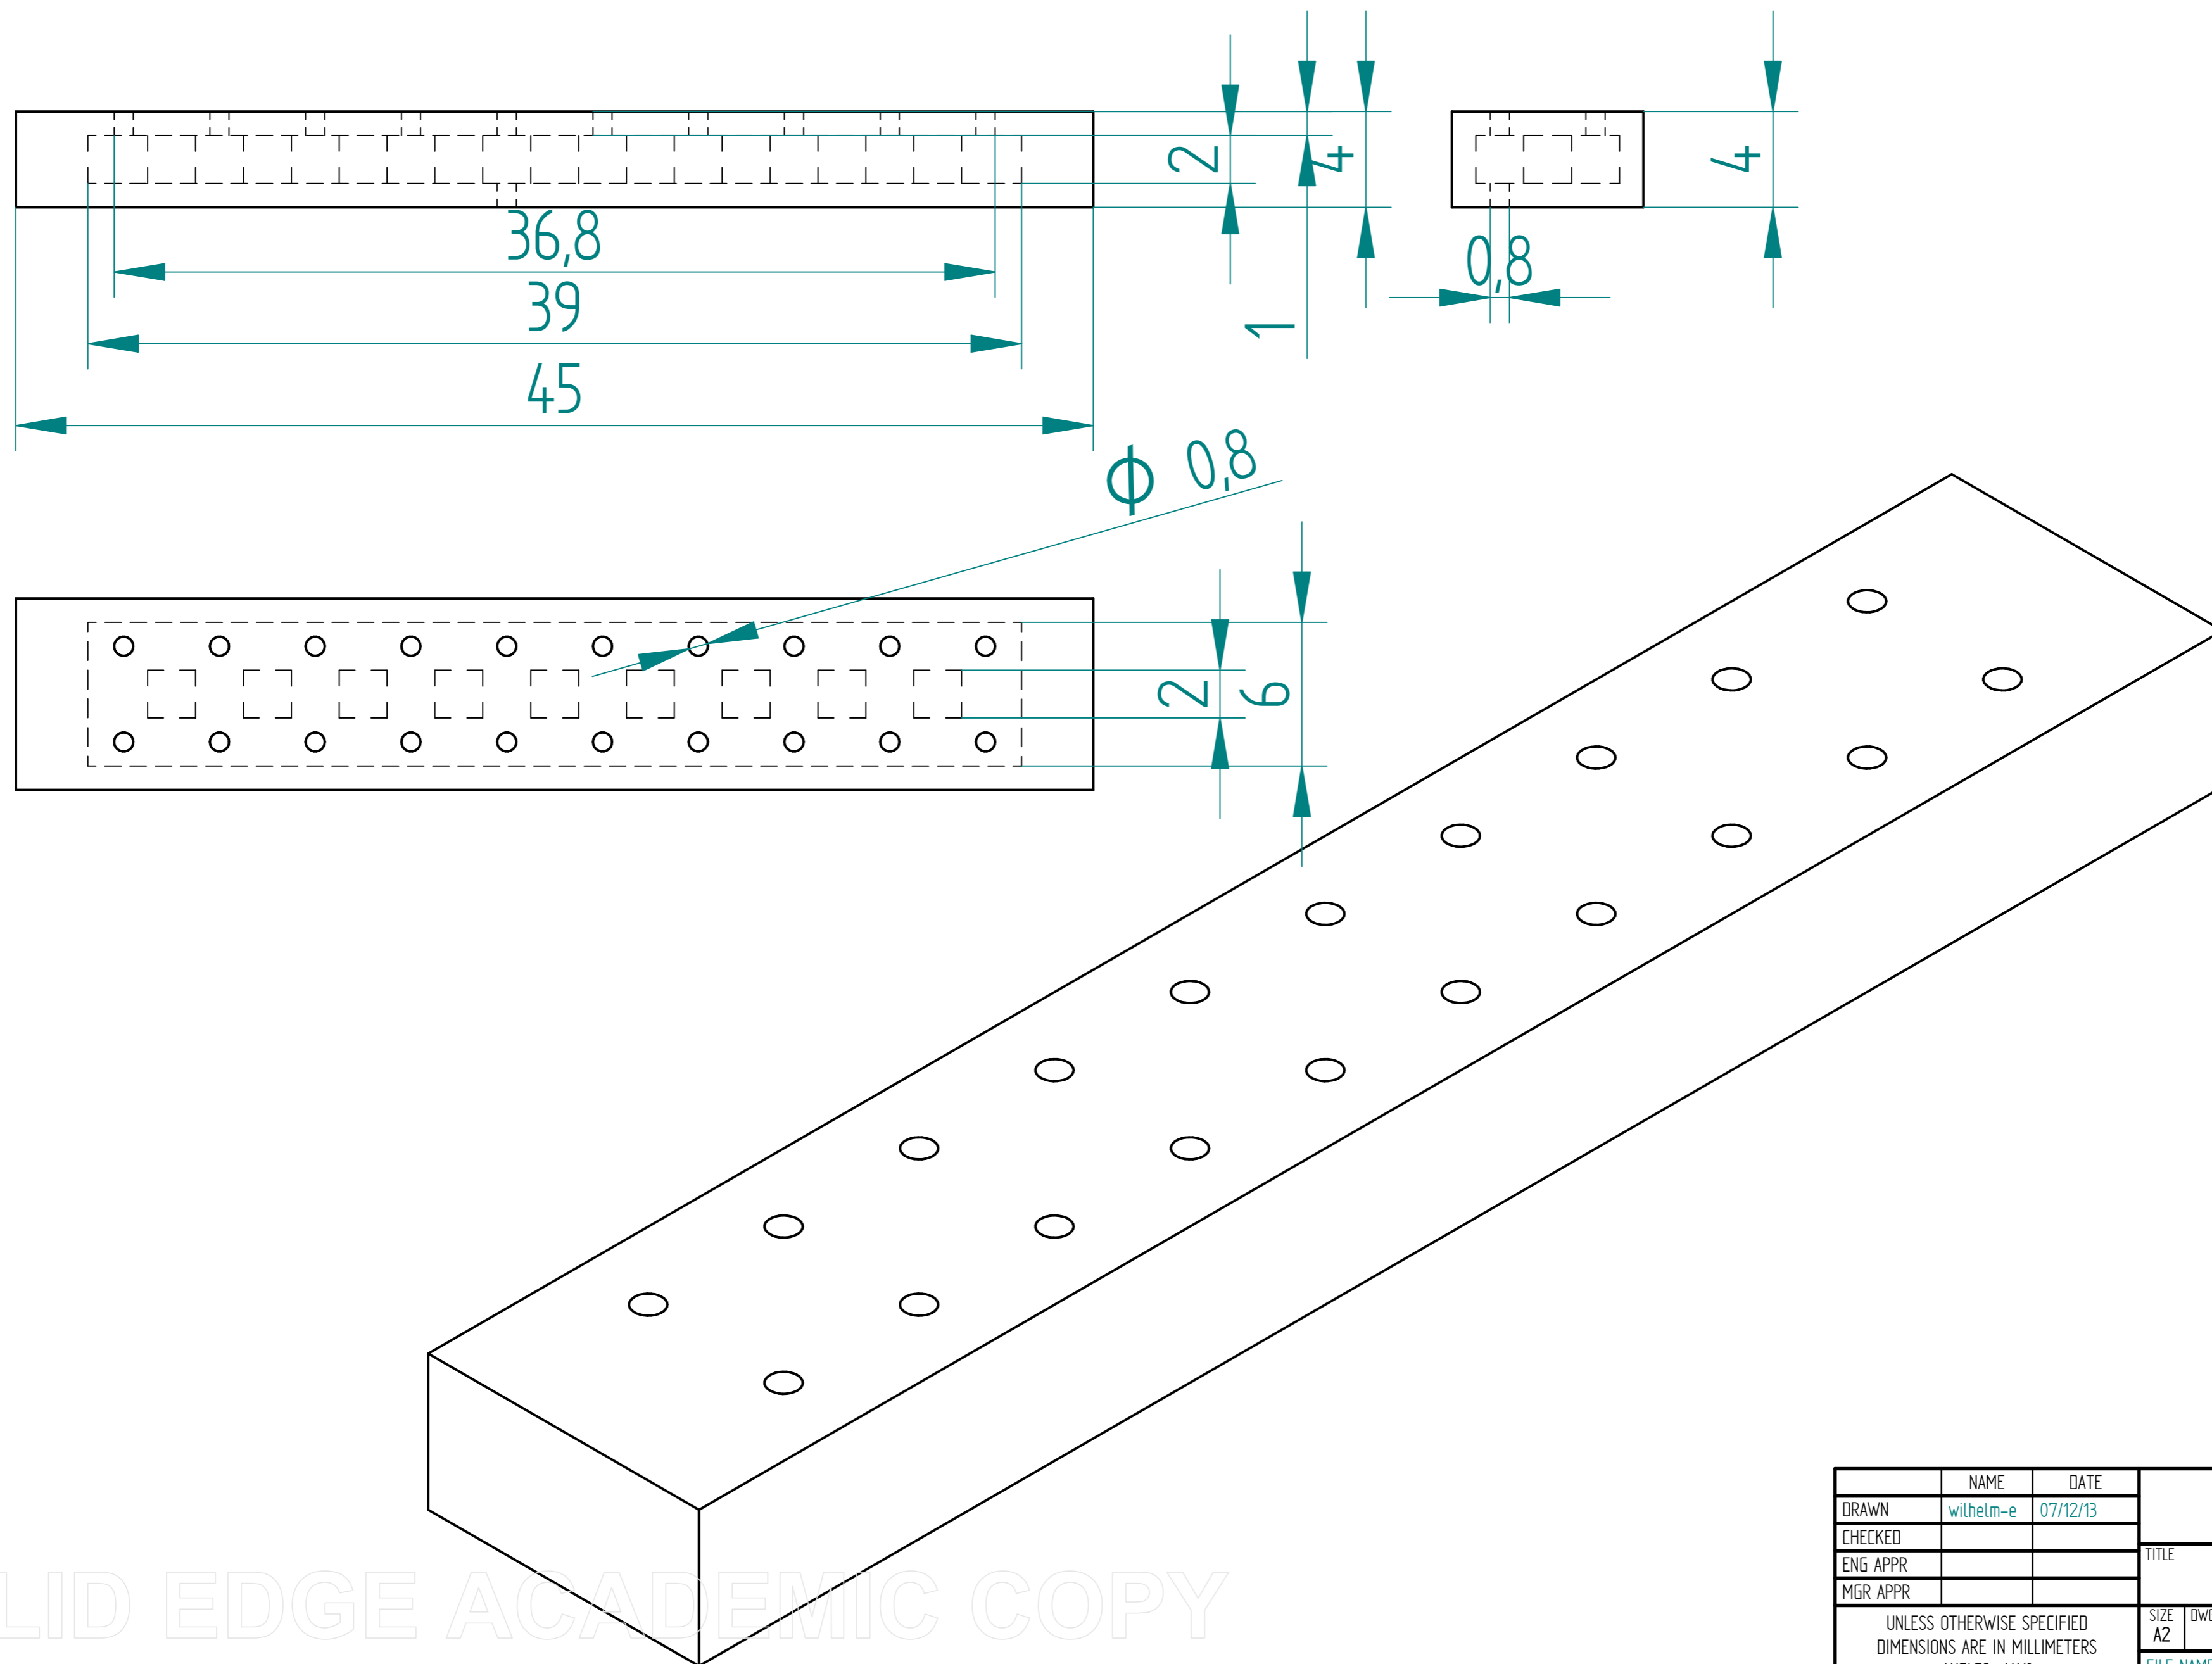

SOLID EDGE ACADEMIC COPY

|                                                                                                     |           |          |                                 |         |              |
|-----------------------------------------------------------------------------------------------------|-----------|----------|---------------------------------|---------|--------------|
|                                                                                                     | NAME      | DATE     | Solid Edge                      |         |              |
| DRAWN                                                                                               | wilhelm-e | 07/12/13 |                                 |         |              |
| CHECKED                                                                                             |           |          | TITLE<br>distributor chip       |         |              |
| ENG APPR                                                                                            |           |          |                                 |         |              |
| MGR APPR                                                                                            |           |          | SIZE<br>A2                      | DWG NO  | REV          |
| UNLESS OTHERWISE SPECIFIED<br>DIMENSIONS ARE IN MILLIMETERS<br>ANGLES ±X.X°<br>2 PL ±XXX 3 PL ±XXXX |           |          | FILE NAME: distributor_chip.dft |         |              |
|                                                                                                     |           |          | SCALE:                          | WEIGHT: | SHEET 1 OF 1 |
